# Supplementary material for: A cadmium-based quantification of marine organic carbon burial during the PETM
Source: Research Square preprint supplement (doi:10.21203/rs.3.rs-6680768/v1), 2025-05-23
Supplement: Supplementary file 1 [file 7358990d6cb2630741882d54.xlsx]

## Sheet: Elms et al. 2025 data
Sample details				Geochemical data
Sample no.	Location	Core/section	Height/depth	δ114Cd	δ114Cd (2σ)	[Cd]	[Mo]	[Al]		Concentration data in ppm
Svalbard-1(545.23-545.28)	Central Basin, Spitsbergen	BH9-05	545.23	-0.113615	0.0420468	0.270028	4.05114	51022.2		Isotope data reported as ‰ deviation relative to the NIST3108 zero-delta standard
Svalbard-2(541.27-541.32)	Central Basin, Spitsbergen	BH9-05	541.27	-0.197825	0.0443871	0.194194	1.27699	71704.1
Svalbard-3(539.35-539.40)	Central Basin, Spitsbergen	BH9-05	539.35	0.181879	0.0452234	0.21298	0.286241	88274.6		Anomalously low δ114Cd value in BH9-05 of -0.81 ‰ is believed to be due to the effects of weathering immediately prior to the core of the event, based on previous studies (Wieczorek et al., 2013; Dickson et al., 2015)
Svalbard-4(538.66-538.72)	Central Basin, Spitsbergen	BH9-05	538.66	0.0987134	0.0940013	0.298725	1.29257	54284.3		Anomalously low δ114Cd values in E-8X of -0.74 and -0.83 ‰ are believed to be due to a redox fluctuation towards more euxinic values, but which did not result in quantitative CdS burial (Mariani et al., 2024)
Svalbard-5(538.00-538.05)	Central Basin, Spitsbergen	BH9-05	538	-0.07907	0.0415822	0.301899	0.31146	90712.5
Svalbard-6(537.30-537.36)	Central Basin, Spitsbergen	BH9-05	537.3	-0.158521	0.0354865	0.258788	0.454349	73032.9		Wieczorek, R. et al. (2013) Geochimica et Cosmochimica Acta 119 391-410, https://doi.org/10.1016/j.gca.2013.06.005
Svalbard-7(536.66-536.73)	Central Basin, Spitsbergen	BH9-05	536.66	-0.109758	0.0393045	0.23327	0.586947	83568.6		Dickson, AJ et al. (2015) Palaeogeography, Palaeoclimatology, Palaeoecology 438 300-307, https://doi.org/10.1016/j.palaeo.2015.08.019
Svalbard-8(536.00-536.06)	Central Basin, Spitsbergen	BH9-05	536	-0.0239254	0.043211	0.255193	0.595957	83624.2		Sweere, T. et al. (2016) Chemical Geology 441 235-25, https://doi.org/10.1016/j.chemgeo.2016.08.028
Svalbard-9(535.32-535.38)	Central Basin, Spitsbergen	BH9-05	535.32	-0.148198	0.0303295	0.239098	1.61255	56126.9		Mariani E et al., (2024) Paleoceanography and Paleoclimatology 39 e2023PA004756, https://doi.org/10.1029/2023PA004756
Svalbard-10(534.65-534.71)	Central Basin, Spitsbergen	BH9-05	534.65	-0.126547	0.0405336	0.239671	0.279045	73785.9
Svalbard-11(534.00-534.05)	Central Basin, Spitsbergen	BH9-05	534	-0.0579847	0.0376992	0.41896	1.13182	66857.9
Svalbard-12(533.32-533.38)	Central Basin, Spitsbergen	BH9-05	533.32	-0.164291	0.0367367	0.16864	0.78935	80100.9
Svalbard-13(532.65-532.70)	Central Basin, Spitsbergen	BH9-05	532.65	-0.243848	0.0365468	0.248595	3.88825	86974.4
Svalbard-14(532.00-532.05)	Central Basin, Spitsbergen	BH9-05	532	-0.218386	0.0372356	0.27896	2.24147	75531.8
Svalbard-15(531.63-531.68)	Central Basin, Spitsbergen	BH9-05	531.63	-0.196137	0.0452421	0.208388	1.9843	113742
Svalbard-16(531.00-531.05)	Central Basin, Spitsbergen	BH9-05	531	-0.812582	0.0654726	0.139273	1.09492	127937
Svalbard-17(527.00-527.05)	Central Basin, Spitsbergen	BH9-05	527	0.54119	0.0522426	0.330457	17.7474	65784.7
Svalbard-18(526.40-526.45)	Central Basin, Spitsbergen	BH9-05	526.4	0.111141	0.0475809	0.359299	19.9109	66304.3
Svalbard-19(525.70-525.75)	Central Basin, Spitsbergen	BH9-05	525.7	0.0485853	0.0432311	0.306859	16.9089	74508.1
Svalbard-20(525.00-525.05)	Central Basin, Spitsbergen	BH9-05	525	0.025217	0.0398106	0.356038	16.8026	87608
Svalbard-21(517.70-517.75)	Central Basin, Spitsbergen	BH9-05	517.7	-0.050822	0.0482794	0.247798	6.22882	70385.5
Svalbard-22(511.00-511.05)	Central Basin, Spitsbergen	BH9-05	511	-0.262393	0.0456453	0.184339	0.999088	102956
Svalbard-23(504.35-504.40)	Central Basin, Spitsbergen	BH9-05	504.35	-0.296216	0.0449998	0.187286	0.85792	84702.3
32X-2-W-116-117	Lomonosov Ridge, Arctic Ocean	IODP-ACEX 302-M0004a	390.66	-0.0412597	0.0400506	0.334896	4.59838	76645.1
32X-2-W-84-85	Lomonosov Ridge, Arctic Ocean	IODP-ACEX 302-M0004a	390.34	-0.192955	0.0319673	1.73611	5.2344	61316.9
32X-2-W-44-45	Lomonosov Ridge, Arctic Ocean	IODP-ACEX 302-M0004a	389.94	-0.211993	0.0264323	1.5345	6.60604	66784
32X-2-W-23-24	Lomonosov Ridge, Arctic Ocean	IODP-ACEX 302-M0004a	389.73	-0.221519	0.0434048	0.546641	4.11866	58911.6
32X-1-W-135-136	Lomonosov Ridge, Arctic Ocean	IODP-ACEX 302-M0004a	389.35	-0.107944	0.0281914	1.41985	3.39864	74716.1
32X-1-W-80-81	Lomonosov Ridge, Arctic Ocean	IODP-ACEX 302-M0004a	388.8	-0.103312	0.0341928	0.72311	10.6241	76049.3
32X-1-W-63-64	Lomonosov Ridge, Arctic Ocean	IODP-ACEX 302-M0004a	388.63	-0.115609	0.0345607	0.162122	42.6167	68602.1
31X-CC-W-43-44	Lomonosov Ridge, Arctic Ocean	IODP-ACEX 302-M0004a	386.13	-0.038097	0.0380655	1.17102	41.1396	70214.5
31X-CC-W-25-26	Lomonosov Ridge, Arctic Ocean	IODP-ACEX 302-M0004a	385.95	-0.0145481	0.044534	1.16045	40.5954	67547.7
31X-CC-W-7-8	Lomonosov Ridge, Arctic Ocean	IODP-ACEX 302-M0004a	385.77	-0.0169231	0.0441371	1.23304	39.4405	60479.1
30X-3-W-101-102	Lomonosov Ridge, Arctic Ocean	IODP-ACEX 302-M0004a	384.34	-0.0481166	0.0402401	1.12306	37.5964	55083.5
30X-3-W-82.5-83.5	Lomonosov Ridge, Arctic Ocean	IODP-ACEX 302-M0004a	384.155	0.0625429	0.0402998	1.17302	42.4052	71497.5
30X-3-W-62-63	Lomonosov Ridge, Arctic Ocean	IODP-ACEX 302-M0004a	383.95	4.97911e-05	0.0377032	1.27252	38.7269	103805
30X-3-W-37-38	Lomonosov Ridge, Arctic Ocean	IODP-ACEX 302-M0004a	383.7	0.0836992	0.0375233	1.19046	40.1188	90890.8
30X-3-W-22.5-23.5	Lomonosov Ridge, Arctic Ocean	IODP-ACEX 302-M0004a	383.555	0.0988941	0.0358614	0.945529	34.1324	65583
30X-3-W-1-2	Lomonosov Ridge, Arctic Ocean	IODP-ACEX 302-M0004a	383.34	0.0109245	0.0407053	1.26054	39.9896	61838.6
30X-2-W-138.5-139.5	Lomonosov Ridge, Arctic Ocean	IODP-ACEX 302-M0004a	383.185	0.165216	0.0382594	2.26317	79.7569	64777.7
30X-2-W-124-125	Lomonosov Ridge, Arctic Ocean	IODP-ACEX 302-M0004a	383.05	0.136219	0.0371398	3.2311	79.9761	40342.5
30X-2-W-102.5-103.5	Lomonosov Ridge, Arctic Ocean	IODP-ACEX 302-M0004a	382.835	0.104887	0.0487774	2.49199	55.1226	53016
30X-2-W-77-78	Lomonosov Ridge, Arctic Ocean	IODP-ACEX 302-M0004a	382.58	-0.0659978	0.0538628	0.793416	18.2625	56802.9
30X-2-W-63-64	Lomonosov Ridge, Arctic Ocean	IODP-ACEX 302-M0004a	382.44	-0.0451066	0.0445368	0.495463	6.78857	94558
30X-2-W-37-38	Lomonosov Ridge, Arctic Ocean	IODP-ACEX 302-M0004a	382.18	-0.134973	0.0348762	1.14778	16.4831	73179.9
30X-2-W-22.5-23.5	Lomonosov Ridge, Arctic Ocean	IODP-ACEX 302-M0004a	382.035	-0.194266	0.0328969	0.739021	11.062	93756.9
30X-1-W-122-123	Lomonosov Ridge, Arctic Ocean	IODP-ACEX 302-M0004a	381.52	-0.1301	0.0361996	0.423786	1.34701	67461.9
29X-1-W-79-80	Lomonosov Ridge, Arctic Ocean	IODP-ACEX 302-M0004a	378.59	-0.0969006	0.0360905	0.463076	2.43559	64596.3
29X-1-W-60-61	Lomonosov Ridge, Arctic Ocean	IODP-ACEX 302-M0004a	378.4	-0.104905	0.0387056	1.14479	5.03036	62625.5
29X-1-W-40-41	Lomonosov Ridge, Arctic Ocean	IODP-ACEX 302-M0004a	378.2	-0.0336295	0.0354494	0.503503	5.79307	75259.4
MPA 66699	North Sea, Denmark	E-8X	2026.85	-0.0436746	0.0356847	0.186138	5.53651	61980.3
MPA 66693	North Sea, Denmark	E-8X	2026.78	0.0609961	0.0261471	0.337446	1.49821	58334
MPA 66686	North Sea, Denmark	E-8X	2026.7	0.0854792	0.0305209	0.569517	1.6712	61136.8
MPA 66669	North Sea, Denmark	E-8X	2026.5	-0.293005	0.0362092	1.18543	22.8807	55579.1
MPA 66655	North Sea, Denmark	E-8X	2026.31	-0.122051	0.0373582	1.00373	17.5107	60416
MPA 65896	North Sea, Denmark	E-8X	2026.02	0.0632203	0.040745	1.47758	3.93096	67832.7
MPA 63939	North Sea, Denmark	E-8X	2025.95	-0.744429	0.0363174	1.0261	5.68274	67585.8
MPA 65888	North Sea, Denmark	E-8X	2025.92	-0.833705	0.0354133	0.735901	25.0784	46117.4
MPA 65882	North Sea, Denmark	E-8X	2025.83	0.0110009	0.0351642	0.550775	3.01106	67152.8
MPA 65875	North Sea, Denmark	E-8X	2025.75	-0.163402	0.0413893	1.03704	4.83394	66536.5
MPA 65870	North Sea, Denmark	E-8X	2025.69	-0.083167	0.036438	0.718891	3.9744	67179.6
MPA 65866	North Sea, Denmark	E-8X	2025.64	-0.135013	0.0348219	0.76444	7.33509	54175.7
2017-44	North Sea, Denmark	E-8X	2025.6	-0.125636	0.0353147	0.729721	7.00574	60312.2
MPA 63934	North Sea, Denmark	E-8X	2025.55	-0.0629792	0.0344298	0.575489	10.2712	57023.3
2017-39	North Sea, Denmark	E-8X	2025.52	-0.0873166	0.0302869	0.599389	7.12592	63307.5
MPA 66623	North Sea, Denmark	E-8X	2025.51	-0.138037	0.0407372	0.963473	10.475	60188.4
MPA 66626	North Sea, Denmark	E-8X	2025.47	0.0763077	0.0489698	1.11248	11.0616	52985.3
MPA 66630	North Sea, Denmark	E-8X	2025.41	-0.141387	0.0400999	0.882017	9.63983	60460.7
2017-36	North Sea, Denmark	E-8X	2025.4	0.423509	0.0487971	2.20514	39.1275	58282.6
MPA 63924	North Sea, Denmark	E-8X	2025.37	0.200877	0.0476347	3.08517	71.4665	49259.1
MPA 66634	North Sea, Denmark	E-8X	2025.35	0.126157	0.0428375	3.31757	84.6641	51731.1
MPA 66636	North Sea, Denmark	E-8X	2025.33	-0.0885547	0.0490685	4.45	93.0968	52119
MPA 63925	North Sea, Denmark	E-8X	2025.3	0.125382	0.0406163	3.92679	87.9685	46421.5
MPA 66645	North Sea, Denmark	E-8X	2025.22	0.101643	0.044353	12.6452	95.4407	41895.7
2017-21	North Sea, Denmark	E-8X	2025.18	0.110712	0.0331534	8.27584	80.5063	38839
MPA 65817	North Sea, Denmark	E-8X	2025.07	0.0722052	0.0273691	5.83889	81.9587	32210.7
MPA 63928	North Sea, Denmark	E-8X	2025.05	0.0508623	0.0295751	5.3294	72.3891	32720.6
MPA 63929	North Sea, Denmark	E-8X	2024.98	0.374089	0.0368059	7.01457	76.214	33758.3
MPA 63930	North Sea, Denmark	E-8X	2024.89	0.0682113	0.033299	4.21441	103.347	33064.2
MPA 63931	North Sea, Denmark	E-8X	2024.81	0.0196608	0.0380545	3.54634	70.6806	33269.8
MPA 65846	North Sea, Denmark	E-8X	2024.74	-0.0546511	0.0383984	3.0426	67.0043	26331.5
MPA 65852	North Sea, Denmark	E-8X	2024.66	-0.00905942	0.0375933	2.87491	49.6209	22415.6
MPA 65855	North Sea, Denmark	E-8X	2024.61	0.155305	0.039617	12.0245	89.0178	32769.2
MPA 66621	North Sea, Denmark	E-8X	2024.58	-0.0519925	0.0416056	2.29821	41.2651	21440.9
MPA 66618	North Sea, Denmark	E-8X	2024.55	-0.0991097	0.0252136	2.64087	65.2767	25142
MPA 66611	North Sea, Denmark	E-8X	2024.47	0.176618	0.0280116	2.67714	42.1616	20729.7
MPA 63920	North Sea, Denmark	E-8X	2024.42	0.0964465	0.035165	1.36808	39.0701	19573.2
MPA 66601	North Sea, Denmark	E-8X	2024.33	0.0130898	0.0345607	1.84244	35.0441	18374.1
MPA 63917	North Sea, Denmark	E-8X	2024.19	0.104946	0.039184	1.33585	29.2246	32632.9
MPA 66590	North Sea, Denmark	E-8X	2024.17	-0.14757	0.0354043	1.57222	44.9488	23015.6
MPA 66586	North Sea, Denmark	E-8X	2024.13	0.21195	0.0359873	2.89833	40.0308	20662.8
MPA 66583	North Sea, Denmark	E-8X	2024.08	0.0162509	0.0405137	2.09773	46.524	20846.3
MPA 66582	North Sea, Denmark	E-8X	2024.07	0.237209	0.038375	2.75519	59.0849	26984.7
MPA 66578	North Sea, Denmark	E-8X	2024.03	-0.0869148	0.0386359	1.46666	40.3057	22975.9
MPA 66566	North Sea, Denmark	E-8X	2023.83	-0.0873324	0.0448896	2.00523	64.4885	21285.6
MPA 66559	North Sea, Denmark	E-8X	2023.72	-0.0523177	0.0396277	1.05584	22.1127	14640.9
MPA 66546	North Sea, Denmark	E-8X	2023.56	-0.115152	0.0377764	1.43872	31.8129	19045.3
MPA 66541	North Sea, Denmark	E-8X	2023.5	-0.200091	0.0344433	1.10841	40.1742	21054
MPA 66535	North Sea, Denmark	E-8X	2023.43	-0.0206915	0.0280518	1.44935	53.0214	31011.6
MPA 66521	North Sea, Denmark	E-8X	2023.27	0.23886	0.0386194	3.66257	70.1384	25798.8
MPA 66514	North Sea, Denmark	E-8X	2023.21	-0.11116	0.0334629	2.30443	59.0398	25539.3
MPA 66500	North Sea, Denmark	E-8X	2023.08	-0.0949868	0.0299635	3.40992	74.6137	30297.8
MPA 66494	North Sea, Denmark	E-8X	2023	-0.0756785	0.0358405	2.41281	86.5305	28144.1
MPA 66487	North Sea, Denmark	E-8X	2022.93	-0.00602609	0.0395301	2.73847	74.6709	33583.1
MPA 66480	North Sea, Denmark	E-8X	2022.85	0.182677	0.0404563	3.50322	96.887	29350.2
MPA 66467	North Sea, Denmark	E-8X	2022.71	-0.0953473	0.0407284	2.90497	93.7614	31738
MPA 66460	North Sea, Denmark	E-8X	2022.62	-0.0191858	0.0256953	3.09311	117.526	33431.8
MPA 66458	North Sea, Denmark	E-8X	2022.6	-0.186812	0.0368233	2.9138	146.217	34252.2
MPA 66453	North Sea, Denmark	E-8X	2022.55	-0.193892	0.0369708	1.62049	62.224	31811.6
MPA 66450	North Sea, Denmark	E-8X	2022.52	-0.211844	0.0700611	2.27007	81.564	50168.1
MPA 66445	North Sea, Denmark	E-8X	2022.47	-0.0385555	0.0311524	4.31994	120.117	39277.9
MPA 66423	North Sea, Denmark	E-8X	2022.25	0.0018084	0.0330377	3.46674	87.272	40878.2
MPA 66417	North Sea, Denmark	E-8X	2022.2	-0.334635	0.0475195	1.56821	62.7142	37312.2
MPA 66404	North Sea, Denmark	E-8X	2022.04	-0.258597	0.0425512	1.68584	66.3532	44225.8
MPA 66397	North Sea, Denmark	E-8X	2021.98	-0.0788324	0.0452535	1.30706	37.4339	37265.8
MPA 66391	North Sea, Denmark	E-8X	2021.92	0.149404	0.0478952	1.55042	27.4417	40459.1
MPA 63886	North Sea, Denmark	E-8X	2021.71	-0.250442	0.0489408	1.58135	70.1068	35009
MPA 66363	North Sea, Denmark	E-8X	2021.63	-0.431123	0.0487697	2.19065	45.3414	42286.3
MPA 66356	North Sea, Denmark	E-8X	2021.56	-0.469465	0.0453045	1.46751	64.8489	39603.3
MPA 66351	North Sea, Denmark	E-8X	2021.51	-0.311873	0.0421684	2.03529	62.95	40590.1
MPA 66346	North Sea, Denmark	E-8X	2021.43	-0.152135	0.0427428	1.13461	31.8642	39432.7
MPA 66331	North Sea, Denmark	E-8X	2021.26	-0.216471	0.0517996	1.79975	34.5738	39843.3
MPA 66320	North Sea, Denmark	E-8X	2021.13	-0.225399	0.0470743	1.63209	38.4997	41781
723	Northern Caucasus, Russia	Kheu River	2.08	-0.149011	0.0461839	0.133398	0.584938	57027.1
720	Northern Caucasus, Russia	Kheu River	1.48	-0.0161946	0.0477251	0.139769	0.577393	48748.6
717	Northern Caucasus, Russia	Kheu River	1.03	-0.0965356	0.0437188	0.110054	1.14324	51959
715	Northern Caucasus, Russia	Kheu River	0.73	-0.0312852	0.0264882	0.399959	2.04721	36959.7
E4 top (top)	Northern Caucasus, Russia	Kheu River	0.568	-0.16608	0.0305455	2.68919	3.08526	40373.3
E4 top (bottom)	Northern Caucasus, Russia	Kheu River	0.557	-0.0926508	0.0366465	2.2429	2.90191	45139.8
E3	Northern Caucasus, Russia	Kheu River	0.526	-0.148574	0.0414042	2.35874	4.02179	48602.5
E2	Northern Caucasus, Russia	Kheu River	0.511	-0.2302	0.0305779	1.60383	4.22956	47427.6
E1 dark	Northern Caucasus, Russia	Kheu River	0.5045	-0.296226	0.0472143	1.87402	7.79383	60027.2
D5 mid/top	Northern Caucasus, Russia	Kheu River	0.5045	-0.379838	0.0460091	2.15587	7.92857	60444.2
E1 light	Northern Caucasus, Russia	Kheu River	0.488	-0.428364	0.051307	2.79355	4.24734	46817.3
D5 base	Northern Caucasus, Russia	Kheu River	0.488	-0.139477	0.0606898	2.15594	1.88242	40068.7
D4 top	Northern Caucasus, Russia	Kheu River	0.478	-0.280632	0.0366181	6.97446	7.22554	62789
D4 middle (top)	Northern Caucasus, Russia	Kheu River	0.473	-0.310554	0.0524264	2.83277	8.16625	62781.5
D4 middle (bottom)	Northern Caucasus, Russia	Kheu River	0.468	-0.389284	0.0413929	2.05009	6.09794	57194
D4 bottom	Northern Caucasus, Russia	Kheu River	0.463	-0.384693	0.0499745	1.13334	3.82063	46970.8
D3 top	Northern Caucasus, Russia	Kheu River	0.442	-0.19664	0.0435245	1.19609	3.48078	40003.5
D2 top	Northern Caucasus, Russia	Kheu River	0.408	-0.16683	0.0467476	2.00006	5.79534	46243.7
D2 mid	Northern Caucasus, Russia	Kheu River	0.402	-0.198582	0.0396886	0.831909	4.20939	40576.3
D2 base	Northern Caucasus, Russia	Kheu River	0.388	-0.0672761	0.0418943	1.34523	2.82603	37303.8
D1 dark top	Northern Caucasus, Russia	Kheu River	0.3705	0.0211101	0.0467925	3.50203	9.80305	38364.9
D1 base	Northern Caucasus, Russia	Kheu River	0.353	0.0125466	0.0450135	0.507423	3.24839	34582.5
C7	Northern Caucasus, Russia	Kheu River	0.323	-0.437011	0.0409239	0.667202	4.37933	51568.4
C6	Northern Caucasus, Russia	Kheu River	0.303	-0.164177	0.0368623	1.09975	2.52124	37414.2
C5	Northern Caucasus, Russia	Kheu River	0.288	-0.160828	0.0415797	1.91055	4.91327	51725.7
C4	Northern Caucasus, Russia	Kheu River	0.273	-0.151206	0.032883	1.16642	3.87828	36685.5
C3	Northern Caucasus, Russia	Kheu River	0.263	-0.100188	0.0450938	1.41315	5.11668	35192.5
C2	Northern Caucasus, Russia	Kheu River	0.255	0.00446184	0.0363091	0.490947	2.77224	36344.2
C1	Northern Caucasus, Russia	Kheu River	0.238	-0.0302955	0.0479359	0.48902	3.41536	35555.8
B5	Northern Caucasus, Russia	Kheu River	0.223	-0.0273054	0.0434567	1.18325	6.44085	40785.8
B4 top	Northern Caucasus, Russia	Kheu River	0.198	-0.0877827	0.0475581	0.879354	5.4077	38043.8
B4 base	Northern Caucasus, Russia	Kheu River	0.193	-0.0216844	0.0445445	1.56235	4.09741	37411.3
B3 top	Northern Caucasus, Russia	Kheu River	0.1855	-0.0955916	0.0353529	1.24805	5.21954	47848.1
B3 base	Northern Caucasus, Russia	Kheu River	0.178	-0.172652	0.0361181	1.2343	3.01817	32257.5
B2 top	Northern Caucasus, Russia	Kheu River	0.172	-0.104796	0.0495173	1.2872	5.16678	35350.4
B2 base	Northern Caucasus, Russia	Kheu River	0.166	-0.0251577	0.040557	2.28057	4.72479	35979
B1 top	Northern Caucasus, Russia	Kheu River	0.1565	0.017719	0.0420812	2.20731	4.43886	43992.2
B1 mid	Northern Caucasus, Russia	Kheu River	0.147	-0.106642	0.046501	2.53755	5.02706	44107
B1 base	Northern Caucasus, Russia	Kheu River	0.14	-0.0169475	0.0453715	4.2219	8.10174	57194.8
A8 top	Northern Caucasus, Russia	Kheu River	0.135	-0.112747	0.0436868	0.76963	5.35424	35450.3
A8 bottom (top)	Northern Caucasus, Russia	Kheu River	0.1275	-0.153757	0.0439737	0.79186	6.96201	47901.9
A8 bottom (base)	Northern Caucasus, Russia	Kheu River	0.12	-0.1687	0.0418885	0.860236	5.80998	49947.7
A7 (top)	Northern Caucasus, Russia	Kheu River	0.11	0.0393444	0.0419866	1.96323	4.81821	36328.6
A7 (bottom)	Northern Caucasus, Russia	Kheu River	0.1	0.0956403	0.0435939	2.41668	3.93842	40472.4
A1 9-10 cm (top)	Northern Caucasus, Russia	Kheu River	0.095	-0.0263579	0.042177	1.68753	4.38087	45299
A1 9-10 cm (bottom)	Northern Caucasus, Russia	Kheu River	0.09	0.125237	0.0312227	5.75949	6.69591	45825
A1 8-9 cm	Northern Caucasus, Russia	Kheu River	0.08	-0.0143258	0.0449021	6.52024	8.16636	56655.7
A1 7.5-8 cm	Northern Caucasus, Russia	Kheu River	0.075	0.228066	0.036102	18.0412	6.03302	59265.8
A1 7-7.5 cm	Northern Caucasus, Russia	Kheu River	0.07	0.0329951	0.0415816	13.7995	15.4855	62072.8
A1 6.5-7 cm	Northern Caucasus, Russia	Kheu River	0.065	0.16265	0.0382502	196.328	47.1372	60271.1
A1 6-6.5 cm	Northern Caucasus, Russia	Kheu River	0.06	0.152706	0.0408529	400.003	68.6625	60590.3
A1a 4-6 cm (top)	Northern Caucasus, Russia	Kheu River	0.0533	0.214463	0.0433814	619.741	72.3647	40013
A1 4-6 cm (mid)	Northern Caucasus, Russia	Kheu River	0.0467	0.213286	0.0393387	293.344	73.2458	33058.3
A1 3.5-4 cm	Northern Caucasus, Russia	Kheu River	0.035	0.169639	0.0459774	142.022	113.314	32596.3
A1 3-3.5 cm	Northern Caucasus, Russia	Kheu River	0.03	0.174721	0.0402792	152.634	103.275	31287.2
A1 1.5-3 (upper)	Northern Caucasus, Russia	Kheu River	0.0225	0.0996495	0.0305672	392.468	85.7899	31355.6
A1 1.5-3 (lower)	Northern Caucasus, Russia	Kheu River	0.015	0.104526	0.0403187	11.175	34.4474	56543.5
A1d (dark lam.)	Northern Caucasus, Russia	Kheu River	0.012				0.513929	24849.5
A1c	Northern Caucasus, Russia	Kheu River	0.008				13.7244	41986.9
A1b	Northern Caucasus, Russia	Kheu River	0.004	-0.0169412	0.0398181	14.5502	14.4545	42588.8
A1a	Northern Caucasus, Russia	Kheu River	0	0.329155	0.0488904	23.4935	19.6254	50559.6
713	Northern Caucasus, Russia	Kheu River	-0.15	0.60367	0.0340258	0.271474		35967
711	Northern Caucasus, Russia	Kheu River	-0.45					40378.2
709	Northern Caucasus, Russia	Kheu River	-0.75					24175.8
707	Northern Caucasus, Russia	Kheu River	-1.05	0.0121063	0.0622435	0.107787		31840.8
